# Supplementary material
Source: PubMed Central journal article supplement (PMC4068519)
Supplement: AAC.02605-14_zac007143037so1.pdf [file AAC.02605-14_zac007143037so1.pdf]

**Table S1. In vitro and in vivo antitrypanosomal activities of cationic diamidines.<sup>a</sup>**

|                    | In vitro activity         |                       |                          |                       | In vivo activity              |                  |                           |      |
|--------------------|---------------------------|-----------------------|--------------------------|-----------------------|-------------------------------|------------------|---------------------------|------|
|                    | <i>T. b. r.</i> STIB900wt |                       | <i>T. b. b.</i> BS221    |                       | <i>T. b. r.</i> STIB900 acute |                  | <i>T. b. b.</i> GVR35 CNS |      |
|                    | IC <sub>50</sub> , ng/ml  | IC <sub>50</sub> , μM | IC <sub>50</sub> , ng/ml | IC <sub>50</sub> , μM | 4 x 20 mg/kg i.p.             |                  | 10 x 20 mg/kg i.p.        |      |
| <b>Pentamidine</b> | 1.2                       | 0.0020                | 0.9                      | 0.0015                | 2/4 <sup>b</sup>              | 50% <sup>c</sup> | 0/4 <sup>d</sup>          | 0%   |
| <b>DB75</b>        | 1.0                       | 0.0027                | 1.2                      | 0.0032                | 3/4                           | 75%              | 1/4 <sup>e</sup>          | 25%  |
| <b>DB820</b>       | 2.4                       | 0.0052                | 2.8                      | 0.0060                | 4/4                           | 100%             | 1/5                       | 20%  |
| <b>DB829</b>       | 6.5                       | 0.0147                | 6.0                      | 0.0135                | 4/4                           | 100%             | 4/4                       | 100% |

<sup>a</sup> Most values were derived from an earlier publication by Wenzler et al. (6).

<sup>b</sup> # of cures/# of mice treated.

<sup>c</sup> Percent cured.

<sup>d</sup> Pentamidine was evaluated at 10 x 12.5 and 10 x 25 mg/kg/day i.p.

<sup>e</sup> DB75 was evaluated at 10 x 12.5 mg/kg/day i.p. 10 x 25 mg/kg/day i.p. was toxic.
